# Supplementary figures and images for: Stat3 promotes directional cell migration by regulating Rac1 activity via its activator βPIX
Source: Oxford University Press journal article supplement (doi:10.1242/jcs.057109), 2009-10-27

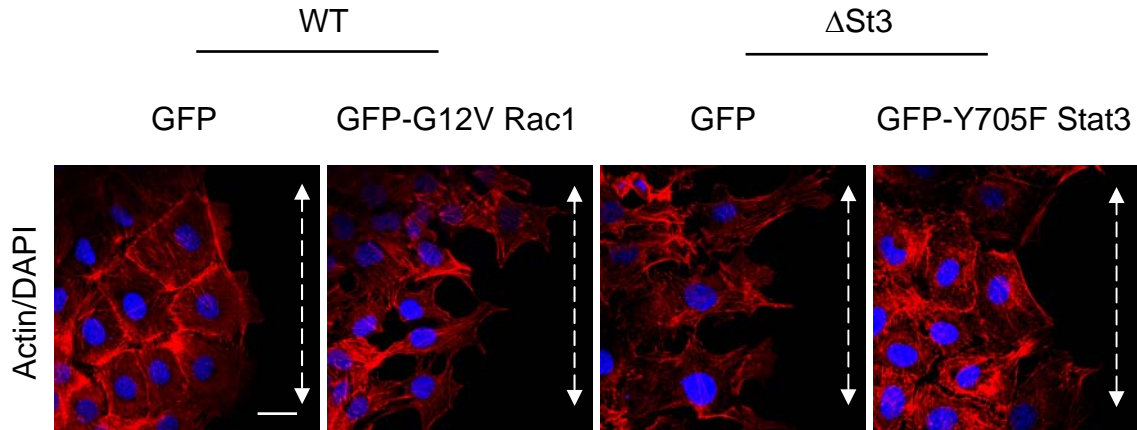

Supplement: jcs057109-sup-057109-figs2.pdf [file jcs057109-sup-057109-figs2.pdf]

Time after  
adhesion (min)

0

30

60

120

WT

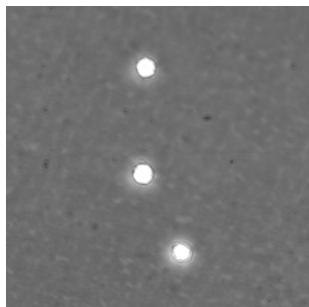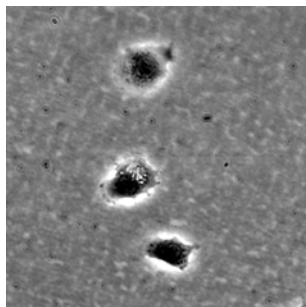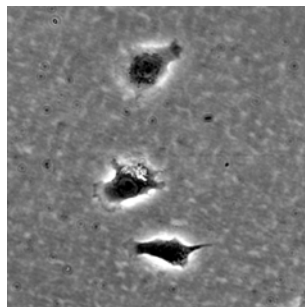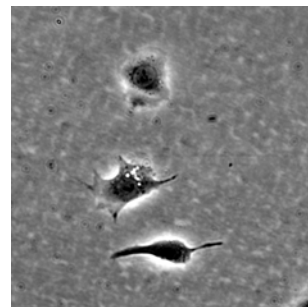

$\Delta$ St3

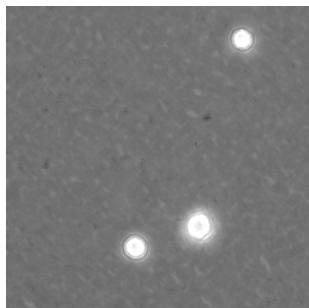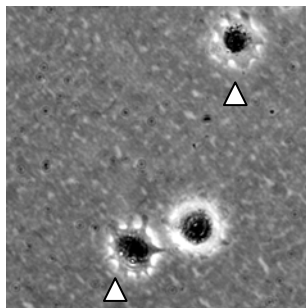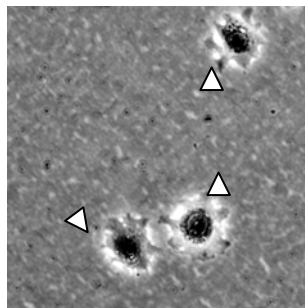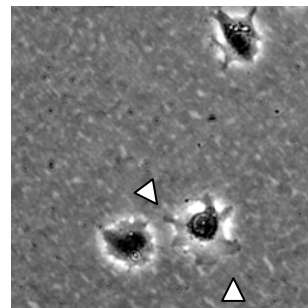

Supplement: jcs057109-sup-057109-figs3.pdf [file jcs057109-sup-057109-figs3.pdf]
